# Supplementary material for: Polyclonal Burkholderia cepacia Complex Outbreak in Peritoneal Dialysis Patients Caused by Contaminated Aqueous Chlorhexidine
Source: PubMed Central journal article supplement (PMC7454066; doi:10.3201/eid2609.191746), 2020-09
Supplement: 19-1746-Techapp-s1.pdf [file 19-1746-Techapp-s1.pdf]

# Polyclonal *Burkholderia cepacia* Complex Outbreak in Peritoneal Dialysis Patients Caused by Contaminated Aqueous Chlorhexidine

## Appendix

### Collection and Laboratory Processing of Environmental, Air, Water, and Antiseptic Samples

Environmental samples were collected by using Polywipe sponge swabs (Medical Wire & Equipment, <https://www.mwe.co.uk>). These swabs are sterile, premoistened, thin, flexible sponges tailor-made for sampling environmental surfaces. The sampled sponge swabs were put into sealed sterile plastic bags individually and were properly labeled before further processing in the laboratory. Samples from the faucets and drains of sinks in renal units were taken by using transport rayon swabs (Copan Diagnostics, <https://www.copanusa.com>) and placed in sterile selective brain heart infusion (BHI) broth (CM1135; Oxoid, <http://www.oxoid.com>) containing 4 µg/mL gentamicin, 15 µg/mL vancomycin, and 1 µg/mL amphotericin B (G3632, V2002, and A4888, respectively; Sigma-Aldrich, <https://www.sigmaaldrich.com>) (CG-BHI) before further processing in the laboratory.

An air sampler, SAS Super ISO 180 model 86834 (VWR International PBI Srl, <https://it.vwr.com>), was used to collect 1,000 liters of air at a rate of 180 liters of air/min for each bacterial air sampling. The air collected was directly pass onto MacConkey agar (CM 0507; Oxoid) containing 0.0005% crystal violet (Merck KGaA, <https://www.emdgroup.com>) and 4 µg/mL gentamicin (CG-MAC) during a 5.5-min process. Because water has been implicated in *Burkholderia cepacia*

complex (BCC) nosocomial outbreaks, 250 mL of water from sinks in renal units were collected into labeled sterile bottles for processing in the laboratory.

Both in-use and unopened antiseptics were collected from the renal unit. Unopened 0.05% aqueous chlorhexidine (aqCHX) were also collected from other units in our hospital. Because many peritoneal dialysis patients obtain their aqCHX from the community, 0.05% aqCHX was also obtained from a medical equipment store in the hospital and outside pharmacies.

### **Specimen Processing**

The air samples on CG-MAC were incubated directly after collection at 37°C in air for 1 day and then at room temperature. Water samples were filtered by using MicroFunnel filter funnels (Pall, <https://www.pall.com>) through a 0.45- $\mu$ m membrane. The membrane was then placed onto CG-MAC and incubated at 37°C for 1 day, and then at room temperature. All initial processing of other environmental samples was performed in class II biosafety cabinets. For each sponge swab specimen, 3 mL CG-BHI was added into a plastic bag, in which the medium was absorbed by the sponge swab specimen. The sponge swab specimen was then squeezed repeatedly for proper mixing. Then, 2 mL of suspension was extracted from the bag and incubated at 37°C overnight, then subcultured onto CG-MAC for incubation at 37°C in air. Swabs in CG-BHI broth were incubated at 37°C overnight, then subcultured onto CG-MAC for incubation at 37°C in air.

All antiseptics were processed in class II biosafety cabinets and 70% alcohol was used to disinfect the surface of the container immediately before specimen collection. Sterile needles and syringes were used to aspirate the antiseptics from the container under aseptic condition. One milliliter of the antiseptic was transferred to 9 mL neutralization broth (BHI plus 2% Tween 80) (P1754; Sigma-Aldrich), 0.3% sodium thiosulphate pentahydrate (27910.260; VWR Chemicals, <https://us.vwr.com>), 0.4% potassium dihydrogen phosphate (26936.260; VWR Chemicals), and 0.5% lecithin. The

suspension was left at room temperature for 5 min. Then, 100 µL of suspension was spread onto blood agar (CM0331; Oxoid) for incubation at 37°C in air.

All culture plates were incubated for  $\leq 5$  days and were examined daily for visible bacterial growth. Any bacterial growth was further speciated. For air samples and antiseptic cultures, bacterial CFUs were also counted.

Peritoneal dialysis catheter exit site swab specimens for BCC surveillance were inoculated onto CG-MAC agar upon arrival at the microbiology laboratory. The inoculated agar was incubated at 37°C in air for 2 days and examined daily for bacterial growth.

### **Genome Sequencing**

The BCC isolates were further analyzed by genome sequencing with the NovaSeq 6000 sequencing system (Illumina Inc., <https://www.illumina.com>) at The University of Hong Kong. A BCC isolate from a peritoneal swab specimen from a patient with acute necrotizing pancreatitis during 2017 and a blood culture isolated during 2018 from a patient with atonic urinary bladder with recurrent urinary tract infection were included as unrelated controls.

Libraries (pair-end sequencing of 151 bp) were prepared on the basis of the protocol for the Nextera XT DNA Sample Prep Kit (Illumina). Enriched libraries were validated by using a Fragment Analyzer (<https://www.agilent.com>) and Qubit (<https://www.thermofisher.com>), and quality control analysis was performed by using a quantitative PCR. The libraries were denatured and diluted to optimal concentration. Illumina NovaSeq 6000 was used for Pair-End 151-bp sequencing.

Using software from Illumina (bcl2fastq), we assigned sequencing reads into individual samples; each sample had an average throughput of 1.7 Gb and a total throughput of 137.9 Gb. In terms of sequence quality, an average of 93% of the bases achieved a quality score of Q30, in which Q30 indicates the accuracy of a base call to be 99.9%.

Sequencing reads were filtered for adaptor sequence and low-quality sequence, followed by retaining only reads with read length  $\geq 40$  bp by using Cutadapt version 1.8.1 (1) and custom scripts. Low quality is defined as reads with  $>5\%$  unknown bases N and reads having  $>50\%$  of bases with a quality value  $\leq 11$ .

De novo genome assembly was performed on samples by using preprocessed reads with SPAdes assembler version 3.13.0 (2). A range of k-mer sizes of 21, 33, 55, and 77 were used. The assembly yielded an average genome size of 8.1 Mb and an average N50 value of 322 Kb, and number of scaffolds ranged from 53 to 134. All assembled sequences were annotated by using Prokka version 1.14.0 (3) and setting genus as *Burkholderia* and species as *cepacia*. Multilocus sequence typing profiles were extracted from whole-genome assemblies by using BIGSdb (4), which is available on the *B. cepacia* complex PubMLST website (<https://pubmlst.org/bcc/>).

### **Phylogenetic Analysis**

Scaffold sequences and reference genome sequence of BCC ST32 were uploaded to the CSIPhylogeny 0v1.4 Web site (5) with default settings. Results from CSIPhylogeny were subsequently imported into FigTree version 1.4.4 (<http://tree.bio.ed.ac.uk>) for visualizing the phylogenetic tree.

### **References**

1. Martin M. Cutadapt removes adapter sequences from high-throughput sequencing reads. EMBnet J. 2011;17:10–12 [cited 2020 May 11]. <https://journal.embnet.org/index.php/embnetjournal/article/view/200>
2. Bankevich A, Nurk S, Antipov D, Gurevich AA, Dvorkin M, Kulikov AS, et al. SPAdes: a new genome assembly algorithm and its applications to single-cell sequencing. J Comput Biol. 2012;19:455–77. [PubMed <https://doi.org/10.1089/cmb.2012.0021>](https://doi.org/10.1089/cmb.2012.0021)

3. Seemann T. Prokka: rapid prokaryotic genome annotation. *Bioinformatics*. 2014;30:2068–9. [PubMed](#)  
<https://doi.org/10.1093/bioinformatics/btu153>
4. Jolley KA, Bray JE, Maiden MCJ. Open-access bacterial population genomics: BIGSdb software, the PubMLST.org website and their applications. *Wellcome Open Res*. 2018;3:124. [PubMed](#)  
<https://doi.org/10.12688/wellcomeopenres.14826.1>
5. Kaas RS, Leekitcharoenphon P, Aarestrup FM, Lund O. Solving the problem of comparing whole bacterial genomes across different sequencing platforms. *PLoS One*. 2014;9:e104984. [PubMed](#)  
<https://doi.org/10.1371/journal.pone.0104984>
6. Berkelman RL, Lewin S, Allen JR, Anderson RL, Budnick LD, Shapiro S, et al. Pseudobacteremia attributed to contamination of povidone-iodine with *Pseudomonas cepacia*. *Ann Intern Med*. 1981;95:32–6. [PubMed](#)  
<https://doi.org/10.7326/0003-4819-95-1-32>
7. Panlilio AL, Beck-Sague CM, Siegel JD, Anderson RL, Yetts SY, Clark NC, et al. Infections and pseudoinfections due to povidone–iodine solution contaminated with *Pseudomonas cepacia*. *Clin Infect Dis*. 1992;14:1078–83. [PubMed](#) <https://doi.org/10.1093/clinids/14.5.1078>
8. Pegues DA, Carson LA, Anderson RL, Norgard MJ, Argent TA, Jarvis WR, et al. Outbreak of *Pseudomonas cepacia* bacteremia in oncology patients. *Clin Infect Dis*. 1993;16:407–11. [PubMed](#)  
<https://doi.org/10.1093/clind/16.3.407>
9. van Laer F, Raes D, Vandamme P, Lammens C, Sion JP, Vrints C, et al. An outbreak of *Burkholderia cepacia* with septicemia on a cardiology ward. *Infect Control Hosp Epidemiol*. 1998;19:112–3. [PubMed](#)  
<https://doi.org/10.2307/30142001>

10. Kaitwatcharachai C, Silpapojakul K, Jitsurong S, Kalnauwakul S. An outbreak of *Burkholderia cepacia* bacteremia in hemodialysis patients: an epidemiologic and molecular study. *Am J Kidney Dis*. 2000;36:199–204. [PubMed https://doi.org/10.1053/ajkd.2000.8295](https://doi.org/10.1053/ajkd.2000.8295)
11. Doit C, Loukil C, Simon AM, Ferroni A, Fontan JE, Bonacorsi S, et al. Outbreak of *Burkholderia cepacia* bacteremia in a pediatric hospital due to contamination of lipid emulsion stoppers. *J Clin Microbiol*. 2004;42:2227–30. [PubMed https://doi.org/10.1128/JCM.42.5.2227-2230.2004](https://doi.org/10.1128/JCM.42.5.2227-2230.2004)
12. Ghazal SS, Al-Mudaimiegh K, Al Fakihi EM, Asery AT. Outbreak of *Burkholderia cepacia* bacteremia in immunocompetent children caused by contaminated nebulized salbutamol in Saudi Arabia. *Am J Infect Control*. 2006;34:394–8. [PubMed https://doi.org/10.1016/j.ajic.2006.03.003](https://doi.org/10.1016/j.ajic.2006.03.003)
13. Abe K, D'Angelo MT, Sunenshine R, Noble-Wang J, Cope J, Jensen B, et al. Outbreak of *Burkholderia cepacia* bloodstream infection at an outpatient hematology and oncology practice. *Infect Control Hosp Epidemiol*. 2007;28:1311–3. [PubMed https://doi.org/10.1086/522679](https://doi.org/10.1086/522679)
14. Yang CJ, Chen TC, Liao LF, Ma L, Wang CS, Lu PL, et al. Nosocomial outbreak of two strains of *Burkholderia cepacia* caused by contaminated heparin. *J Hosp Infect*. 2008;69:398–400. [PubMed https://doi.org/10.1016/j.jhin.2008.03.011](https://doi.org/10.1016/j.jhin.2008.03.011)
15. Heo ST, Kim SJ, Jeong YG, Bae IG, Jin JS, Lee JC. Hospital outbreak of *Burkholderia stabilis* bacteraemia related to contaminated chlorhexidine in haematological malignancy patients with indwelling catheters. *J Hosp Infect*. 2008;70:241–5. [PubMed https://doi.org/10.1016/j.jhin.2008.07.019](https://doi.org/10.1016/j.jhin.2008.07.019)
16. Lee CS, Lee HB, Cho YG, Park JH, Lee HS. Hospital-acquired *Burkholderia cepacia* infection related to contaminated benzalkonium chloride. *J Hosp Infect*. 2008;68:280–2. [PubMed https://doi.org/10.1016/j.jhin.2008.01.002](https://doi.org/10.1016/j.jhin.2008.01.002)

17. Romero-Gómez MP, Quiles-Melero MI, Peña García P, Gutiérrez Altes A, García de Miguel MA, Jiménez C, et al. Outbreak of *Burkholderia cepacia* bacteremia caused by contaminated chlorhexidine in a hemodialysis unit. *Infect Control Hosp Epidemiol*. 2008;29:377–8. [PubMed](#)  
<https://doi.org/10.1086/529032>
18. Sunenshine R, Schultz M, Lawrence MG, Shin S, Jensen B, Zubairi S, et al. An outbreak of postoperative gram-negative bacterial endophthalmitis associated with contaminated trypan blue ophthalmic solution. *Clin Infect Dis*. 2009;48:1580–3. [PubMed](#) <https://doi.org/10.1086/598938>
19. Martins IS, Pellegrino FL, Freitas A, Santos MS, Ferraiuoli GI, Vasques MR, et al. Case-crossover study of *Burkholderia cepacia* complex bloodstream infection associated with contaminated intravenous bromopride. *Infect Control Hosp Epidemiol*. 2010;31:516–21. [PubMed](#) <https://doi.org/10.1086/651667>
20. Souza Dias MB, Cavassin LG, Stempluk V, Xavier LS, Lobo RD, Sampaio JL, et al. Multi-institutional outbreak of *Burkholderia cepacia* complex associated with contaminated mannitol solution prepared in compounding pharmacy. *Am J Infect Control*. 2013;41:1038–42. [PubMed](#)  
<https://doi.org/10.1016/j.ajic.2013.01.033>
21. Boszczowski I, do Prado GV, Dalben MF, Telles RC, Freire MP, Guimarães T, et al. Polyclonal outbreak of bloodstream infections caused by *Burkholderia cepacia* complex in hematology and bone marrow transplant outpatient units. *Rev Inst Med Trop São Paulo*. 2014;56:71–6. [PubMed](#)  
<https://doi.org/10.1590/S0036-46652014000100011>
22. Lalitha P, Das M, Purva PS, Karpagam R, Geetha M, Lakshmi Priya J, et al. Postoperative endophthalmitis due to *Burkholderia cepacia* complex from contaminated anaesthetic eye drops. *Br J Ophthalmol*. 2014;98:1498–502. [PubMed](#) <https://doi.org/10.1136/bjophthalmol-2013-304129>

23. Moehring RW, Lewis SS, Isaacs PJ, Schell WA, Thomann WR, Althaus MM, et al. Outbreak of bacteremia due to *Burkholderia contaminans* linked to intravenous fentanyl from an institutional compounding pharmacy. JAMA Intern Med. 2014;174:606–12. [PubMed](#)  
<https://doi.org/10.1001/jamainternmed.2013.13768>
24. Ko S, An HS, Bang JH, Park SW. An outbreak of *Burkholderia cepacia* complex pseudobacteremia associated with intrinsically contaminated commercial 0.5% chlorhexidine solution. Am J Infect Control. 2015;43:266–8. [PubMed](#) <https://doi.org/10.1016/j.ajic.2014.11.010>
25. Montaña-Remacha C, Márquez-Cruz MD, Hidalgo-Guzmán P, Sánchez-Porto A, Téllez-Pérez FP. An outbreak of *Burkholderia cepacia* bacteremia in a hemodialysis unit, Cadiz, 2014 [in Spanish]. Enferm Infecc Microbiol Clin. 2015;33:646–50. [PubMed](#) <https://doi.org/10.1016/j.eimc.2015.02.013>
26. Paul LM, Hegde A, Pai T, Shetty S, Baliga S, Shenoy S. An outbreak of *Burkholderia cepacia* bacteremia in a neonatal intensive care unit. Indian J Pediatr. 2016;83:285–8. [PubMed](#) <https://doi.org/10.1007/s12098-015-1855-7>
27. Mali S, Dash L, Gautam V, Shastri J, Kumar S. An outbreak of *Burkholderia cepacia* complex in the paediatric unit of a tertiary care hospital. Indian J Med Microbiol. 2017;35:216–20. [PubMed](#)
28. Song JE, Kwak YG, Um TH, Cho CR, Kim S, Park IS, et al. Outbreak of *Burkholderia cepacia* pseudobacteraemia caused by intrinsically contaminated commercial 0.5% chlorhexidine solution in neonatal intensive care units. J Hosp Infect. 2018;98:295–9. [PubMed](#)  
<https://doi.org/10.1016/j.jhin.2017.09.012>
29. Brooks RB, Mitchell PK, Miller JR, Vasquez AM, Havlicek J, Lee H, et al. Multistate outbreak of *Burkholderia cepacia* complex bloodstream infections after exposure to contaminated saline flush syringes—United States, 2016–2017. Clin Infect Dis. 2018. [PubMed](#)



30. Hamill RJ, Houston ED, Georghiou PR, Wright CE, Koza MA, Cadle RM, et al. An outbreak of *Burkholderia* (formerly *Pseudomonas*) *cepacia* respiratory tract colonization and infection associated with nebulized albuterol therapy. *Ann Intern Med.* 1995;122:762–6. [PubMed https://doi.org/10.7326/0003-4819-122-10-199505150-00005](https://doi.org/10.7326/0003-4819-122-10-199505150-00005)
31. Reboli AC, Koshinski R, Arias K, Marks-Austin K, Stieritz D, Stull TL. An outbreak of *Burkholderia cepacia* lower respiratory tract infection associated with contaminated albuterol nebulization solution. *Infect Control Hosp Epidemiol.* 1996;17:741–3. [PubMed https://doi.org/10.2307/30141547](https://doi.org/10.2307/30141547)
32. Matrician L, Ange G, Burns S, Fanning WL, Kioski C, Cage GD, et al. Outbreak of nosocomial *Burkholderia cepacia* infection and colonization associated with intrinsically contaminated mouthwash. *Infect Control Hosp Epidemiol.* 2000;21:739–41. [PubMed https://doi.org/10.1086/501719](https://doi.org/10.1086/501719)
33. Balkhy HH, Cunningham G, Francis C, Almuneef MA, Stevens G, Akkad N, et al. A National Guard outbreak of *Burkholderia cepacia* infection and colonization secondary to intrinsic contamination of albuterol nebulization solution. *Am J Infect Control.* 2005;33:182–8. [PubMed https://doi.org/10.1016/j.ajic.2005.01.001](https://doi.org/10.1016/j.ajic.2005.01.001)
34. Molina-Cabrillana J, Bolaños-Rivero M, Alvarez-León EE, Martín Sánchez AM, Sánchez-Palacios M, Alvarez D, et al. Intrinsically contaminated alcohol-free mouthwash implicated in a nosocomial outbreak of *Burkholderia cepacia* colonization and infection. *Infect Control Hosp Epidemiol.* 2006;27:1281–2. [PubMed https://doi.org/10.1086/508845](https://doi.org/10.1086/508845)
35. Estivariz CF, Bhatti LI, Pati R, Jensen B, Arduino MJ, Jernigan D, et al. An outbreak of *Burkholderia cepacia* associated with contamination of albuterol and nasal spray. *Chest.* 2006;130:1346–53. [PubMed https://doi.org/10.1378/chest.130.5.1346](https://doi.org/10.1378/chest.130.5.1346)

36. Kutty PK, Moody B, Gullion JS, Zervos M, Ajluni M, Washburn R, et al. Multistate outbreak of *Burkholderia cenocepacia* colonization and infection associated with the use of intrinsically contaminated alcohol-free mouthwash. *Chest*. 2007;132:1825–31. [PubMed https://doi.org/10.1378/chest.07-1545](https://doi.org/10.1378/chest.07-1545)
37. Serikawa T, Kobayashi S, Tamura T, Uchiyama M, Tsukada H, Takakuwa K, et al. Pseudo outbreak of *Burkholderia cepacia* in vaginal cultures and intervention by hospital infection control team. *J Hosp Infect*. 2010;75:242–3. [PubMed https://doi.org/10.1016/j.jhin.2009.11.013](https://doi.org/10.1016/j.jhin.2009.11.013)
38. Dolan SA, Dowell E, LiPuma JJ, Valdez S, Chan K, James JF. An outbreak of *Burkholderia cepacia* complex associated with intrinsically contaminated nasal spray. *Infect Control Hosp Epidemiol*. 2011;32:804–10. [PubMed https://doi.org/10.1086/660876](https://doi.org/10.1086/660876)
39. Lee S, Han SW, Kim G, Song DY, Lee JC, Kwon KT. An outbreak of *Burkholderia cenocepacia* associated with contaminated chlorhexidine solutions prepared in the hospital. *Am J Infect Control*. 2013;41:e93–6. [PubMed https://doi.org/10.1016/j.ajic.2013.01.024](https://doi.org/10.1016/j.ajic.2013.01.024)
40. Zurita J, Mejia L, Zapata S, Trueba G, Vargas AC, Aguirre S, et al. Healthcare-associated respiratory tract infection and colonization in an intensive care unit caused by *Burkholderia cepacia* isolated in mouthwash. *Int J Infect Dis*. 2014;29:96–9. [PubMed https://doi.org/10.1016/j.ijid.2014.07.016](https://doi.org/10.1016/j.ijid.2014.07.016)
41. Leong LE, Lagana D, Carter GP, Wang Q, Smith K, Stinear TP, et al. *Burkholderia lata* infections from intrinsically contaminated chlorhexidine mouthwash, Australia, 2016. *Emerg Infect Dis*. 2018;24:2109–11. [PubMed https://doi.org/10.3201/eid2411.171929](https://doi.org/10.3201/eid2411.171929)
42. Becker SL, Berger FK, Feldner SK, Karliova I, Haber M, Mellmann A, et al. Outbreak of *Burkholderia cepacia* complex infections associated with contaminated octenidine mouthwash solution, Germany, August to September 2018. *Euro Surveill*. 2018;23. [PubMed https://doi.org/10.2807/1560-7917.ES.2018.23.42.1800540](https://doi.org/10.2807/1560-7917.ES.2018.23.42.1800540)

43. Gleeson S, Mulroy E, Bryce E, Fox S, Taylor SL, Talreja H. *Burkholderia cepacia*: an outbreak in the peritoneal dialysis unit. *Perit Dial Int.* 2019;39:92–5. [PubMed https://doi.org/10.3747/pdi.2018.00095](https://doi.org/10.3747/pdi.2018.00095)

**Appendix Table 1.** Summary of library preparation for whole-genome sequencing of *Burkholderia cepacia* isolates

| Characteristic                               | Summary                                                        |
|----------------------------------------------|----------------------------------------------------------------|
| Average input DNA                            | 1 ng                                                           |
| Library preparation protocol                 | Nextera XT DNA Library Prep Kit Reference Guide (15031942 v02) |
| Index system                                 | IDT UDI Nextera Primer Pairs                                   |
| Changes made to library preparation protocol | None                                                           |
| Sequencer model                              | Novaseq 6000                                                   |
| Run type                                     | Pair end 151 bp                                                |

**Appendix Table 2.** Nature and distribution of throughput of each sample for whole-genome sequencing of *Burkholderia cepacia* isolates

| Sample name | Associated brand                                   | No. raw reads (Read1 + Read2) | Total throughput, Gb | % ≥Q30 bases |
|-------------|----------------------------------------------------|-------------------------------|----------------------|--------------|
| BCAP122     | Brand A                                            | 11,950,402                    | 1.8                  | 94           |
| BCAP128     | Brand A                                            | 11,733,806                    | 1.8                  | 93           |
| BCAP143     | Brand A                                            | 6,274,224                     | 0.9                  | 84           |
| BCAP148     | Brand A                                            | 9,639,536                     | 1.5                  | 94           |
| BCAP166     | Brand A                                            | 10,257,462                    | 1.5                  | 93           |
| BCAP168     | Brand A                                            | 11,702,132                    | 1.8                  | 93           |
| BCAP174     | Brand A                                            | 9,678,166                     | 1.5                  | 91           |
| BCAP177     | Brand A                                            | 8,848,674                     | 1.3                  | 90           |
| BCAP178     | Brand A                                            | 11,773,222                    | 1.8                  | 94           |
| BCAP180     | Brand A                                            | 11,652,572                    | 1.8                  | 94           |
| BCAP228     | Brand A                                            | 11,807,954                    | 1.8                  | 93           |
| BCAP229     | Brand A                                            | 9,000,840                     | 1.4                  | 89           |
| BCAP258     | Brand B                                            | 12,118,698                    | 1.8                  | 94           |
| BCAP267     | Brand B                                            | 11,566,100                    | 1.7                  | 94           |
| BCAP276     | Brand C                                            | 12,404,438                    | 1.9                  | 94           |
| BCAP279     | Brand B                                            | 12,791,322                    | 1.9                  | 94           |
| BCAP284     | Brand B                                            | 10,421,288                    | 1.6                  | 93           |
| BCAP292     | Brand B                                            | 13,069,666                    | 2.0                  | 93           |
| BCAP301     | Brand B                                            | 9,275,042                     | 1.4                  | 90           |
| BCAP302     | Brand B                                            | 11,509,782                    | 1.7                  | 94           |
| BCAP306     | Brand C                                            | 11,978,500                    | 1.8                  | 93           |
| BCAP309     | Brand E                                            | 11,226,918                    | 1.7                  | 94           |
| BCAP314     | Brand D                                            | 13,238,160                    | 2.0                  | 94           |
| BCAP315     | Brand D                                            | 10,598,990                    | 1.6                  | 94           |
| BCAP344     | Brand A                                            | 13,624,626                    | 2.1                  | 94           |
| BCAP345     | Brand A                                            | 14,178,784                    | 2.1                  | 93           |
| Ctl-2017    | Outbreak unrelated blood culture isolate from 2017 | 12,130,950                    | 1.8                  | 94           |
| Ctl-2018    | Outbreak unrelated blood culture isolate from 2018 | 12,620,538                    | 1.9                  | 92           |
| Patient 1   | Brand A                                            | 12,806,494                    | 1.9                  | 94           |
| Patient 2   | Brand A                                            | 12,273,168                    | 1.9                  | 93           |
| Patient 3   | Patient using brand A aqCHX                        | 10,764,710                    | 1.6                  | 93           |
| Patient 4   | Brand A                                            | 11,176,822                    | 1.7                  | 94           |
| Patient 5   | Brand A                                            | 10,950,102                    | 1.7                  | 92           |
| Patient 6   | Brand A                                            | 11,085,726                    | 1.7                  | 94           |
| Patient 7   | Brand A                                            | 11,562,168                    | 1.7                  | 93           |
| Patient 8   | Brand A                                            | 11,588,802                    | 1.8                  | 93           |
| Patient 9   | Brand A                                            | 14,410,584                    | 2.2                  | 94           |
| Patient 10  | Brand A                                            | 11,509,524                    | 1.7                  | 94           |
| Patient 11  | Brand A                                            | 5,409,852                     | 0.8                  | 88           |
| Patient 12  | Brand A                                            | 10,538,318                    | 1.6                  | 94           |
| Patient 13  | Brand B                                            | 13,177,162                    | 2.0                  | 94           |
| Patient 14  | Brand B                                            | 10,687,054                    | 1.6                  | 91           |
| Patient 15  | Brand B                                            | 12,277,634                    | 1.9                  | 92           |
| Patient 16  | Brand B                                            | 12,691,674                    | 1.9                  | 94           |
| Patient 17  | Unknown                                            | 11,599,212                    | 1.8                  | 94           |

| Sample name | Associated brand | No. raw reads (Read1 + Read2) | Total throughput, Gb | % $\geq$ Q30 bases |
|-------------|------------------|-------------------------------|----------------------|--------------------|
| Patient 18  | Brand A          | 11,848,136                    | 1.8                  | 93                 |
| Patient 19  | Brand A          | 12,330,168                    | 1.9                  | 94                 |
| Patient 20  | Brand A          | 12,214,730                    | 1.8                  | 93                 |
| Patient 21  | Brand A and B    | 10,843,768                    | 1.6                  | 92                 |
| Patient 22  | Brand A          | 12,736,614                    | 1.9                  | 93                 |
| Patient 23  | Brand A          | 11,019,666                    | 1.7                  | 92                 |
| Patient 24  | Brand A          | 11,704,104                    | 1.8                  | 94                 |
| Patient 25  | Brand A          | 12,997,772                    | 2.0                  | 93                 |
| Patient 26  | Brand A          | 12,828,720                    | 1.9                  | 94                 |
| Patient 27  | Brand A          | 12,098,718                    | 1.8                  | 94                 |
| Patient 28  | Brand A          | 9,875,416                     | 1.5                  | 95                 |
| Patient 29  | Brand A          | 10,455,064                    | 1.6                  | 94                 |
| Patient 30  | Brand A          | 12,178,434                    | 1.8                  | 94                 |
| Patient 31  | Brand A          | 10,247,674                    | 1.5                  | 94                 |
| Patient 32  | Brand A          | 11,413,460                    | 1.7                  | 94                 |
| Patient 33  | Brand A          | 9,016,084                     | 1.4                  | 76                 |
| Patient 34  | Brand A          | 3,923,344                     | 0.6                  | 86                 |
| Patient 35  | Brand A          | 11,181,508                    | 1.7                  | 91                 |
| Patient 36  | Brand A          | 8,991,288                     | 1.4                  | 90                 |
| Patient 37  | Brand A          | 9,862,958                     | 1.5                  | 94                 |
| Patient 38  | Brand A          | 10,110,866                    | 1.5                  | 92                 |
| Patient 39  | Brand A          | 13,828,424                    | 2.1                  | 93                 |
| Patient 40  | Brand A          | 12,469,812                    | 1.9                  | 94                 |
| Patient 41  | Brand A          | 13,330,094                    | 2.0                  | 94                 |
| Patient 42  | Brand A          | 10,407,292                    | 1.6                  | 94                 |
| Patient 43  | Brand A          | 13,431,490                    | 2.0                  | 94                 |
| Patient 44  | Brand A          | 12,053,012                    | 1.8                  | 94                 |
| Patient 45  | Brand A          | 11,246,962                    | 1.7                  | 94                 |
| Patient 46  | Unknown          | 13,231,332                    | 2.0                  | 94                 |
| Patient 47  | Unknown          | 13,667,616                    | 2.1                  | 94                 |
| Patient 48  | Unknown          | 12,343,144                    | 1.9                  | 93                 |
| Patient 49  | Unknown          | 11,251,576                    | 1.7                  | 92                 |
| Patient 50  | Unknown          | 13,368,328                    | 2.0                  | 94                 |
| Patient 51  | Brand A          | 13,624,934                    | 2.1                  | 93                 |
| Patient 52  | Brand A          | 9,421,366                     | 1.4                  | 89                 |

**Appendix Table 3.** Summary of antiseptic- and medication-related *Burkholderia cepacia* complex outbreaks involving  $\geq$ 50% sterile sites\*

| Year of outbreak, country | Site(s) of BCC isolation             | Duration of outbreak, d† | Type of patients involved                 | No. affected patients | Implicated source (intrinsic or extrinsic contamination)                                              | Multistate or multiple hospital involvement | Reference |
|---------------------------|--------------------------------------|--------------------------|-------------------------------------------|-----------------------|-------------------------------------------------------------------------------------------------------|---------------------------------------------|-----------|
| 1981, United States       | Blood (pseudobacteremia)             | 210                      | Various wards                             | 52                    | Povidone-iodine (intrinsic contamination)                                                             | 4 hospitals                                 | (6)       |
| 1992, United States       | Peritoneal fluid (4) and blood (2)   | 25                       | ICU and HD center in pediatric facilities | 6                     | Povidone-iodine (intrinsic contamination)                                                             | No                                          | (7)       |
| 1993, Georgia             | Blood                                | 85                       | Oncology clinic                           | 14                    | Multiuse IV fluid used for dilution of multiuse vial heparin flush solution (extrinsic contamination) | No                                          | (8)       |
| 1998, Belgium             | Blood                                | 3                        | Cardiology ward                           | 8                     | 1 L dextrose used for heparin dilution (extrinsic contamination)                                      | No                                          | (9)       |
| 2000, Thailand            | Blood (subclavicular line infection) | 7                        | HD                                        | 9                     | 1.5% chlorhexidine-cetrimide prepared from in pharmacy department                                     | No                                          | (10)      |

| Year of outbreak, country | Site(s) of BCC isolation                                            | Duration of outbreak, d† | Type of patients involved                                                             | No. affected patients | Implicated source (intrinsic or extrinsic contamination)                                    | Multistate or multiple hospital involvement | Reference |
|---------------------------|---------------------------------------------------------------------|--------------------------|---------------------------------------------------------------------------------------|-----------------------|---------------------------------------------------------------------------------------------|---------------------------------------------|-----------|
| 2004, France              | Blood (IV catheter as source in 75%)                                | 210                      | NICU, PICU, pediatric gastroenterology                                                | 8                     | Contaminated condensate on the plastic stoppers in lipid emulsion                           | No                                          | (11)      |
| 2006, Saudi Arabia        | Blood                                                               | 21                       | Tertiary care hospital                                                                | 5                     | 0.5% salbutamol solution (intrinsic contamination)                                          | No                                          | (12)      |
| 2007, United States       | Blood/intravenous catheter tips                                     | 214                      | Pediatric hematology and oncology practice, patients with subcutaneous port catheters | 10                    | Multidose medications (extrinsic contamination)                                             | No                                          | (13)      |
| 2008, Taiwan              | 9 blood, 7 central venous catheter tips, 2 urine, 1 HD catheter tip | 90                       | Hospital respiratory care ward and general ward                                       | 15                    | Extrinsic contamination of daily prepared diluted heparin solution in the ward              | No                                          | (14)      |
| 2008, South Korea         | Blood                                                               | 23                       | Cancer center                                                                         | 8                     | 0.5% chlorhexidine solution diluted at hospital site                                        | No                                          | (15)      |
| 2008, South Korea         | Blood (6), urine (1), wound (3), catheter tip (1), unknown (2)      | 21                       | Various wards, especially hemato-oncology and endocrine patients                      | 13                    | Benzalkonium chloride diluted in hospital pharmacy                                          | No                                          | (16)      |
| 2008, Spain               | Blood                                                               | 151                      | HD patients                                                                           | 5                     | Contaminated deionized water used for dilution of 2.5% chlorhexidine at hospital site       | No                                          | (17)      |
| 2009, United States       | Eye (endophthalmitis)                                               | 30                       | Hospital A (4)                                                                        | 4                     | Contaminated trypan blue dye from compounding pharmacy (unopened bottles were contaminated) | Yes                                         | (18)      |
|                           | Eye (endophthalmitis)                                               | 60                       | Hospital B (2)                                                                        | 2                     | Contaminated trypan blue dye from compounding pharmacy (unopened bottles were contaminated) | Yes                                         |           |
| 2010, Brazil              | Blood                                                               | 88                       | Various wards                                                                         | 25                    | IV bromopride (antiemetics)                                                                 | 3 hospitals                                 | (19)      |
| 2013, Brazil              | Blood (4) and urine (3)                                             | 59                       | 350-bed private tertiary care hospital                                                | 7                     | 3% mannitol (intrinsically contaminated) for bladder irrigation                             | No                                          | (20)      |
| 2014, Brazil              | Blood                                                               | 60                       | Hematology and BMT outpatient unit                                                    | 24                    | Multidose vial of IV drug (extrinsic contamination) and a laminar flow cabinet              | No                                          | (21)      |
| 2014, India               | Vitreous samples                                                    | 91                       | Postcataract surgery patients                                                         | 13                    | Local anesthetic eye drops                                                                  | No                                          | (22)      |

| Year of outbreak, country | Site(s) of BCC isolation | Duration of outbreak, d† | Type of patients involved              | No. affected patients | Implicated source (intrinsic or extrinsic contamination) | Multistate or multiple hospital involvement | Reference |
|---------------------------|--------------------------|--------------------------|----------------------------------------|-----------------------|----------------------------------------------------------|---------------------------------------------|-----------|
| 2014, United States       | Blood                    | 7                        | 350-bed private tertiary care hospital | 7                     | Contaminated fentanyl solution (intrinsic contamination) | No                                          | (23)      |
| 2015, South Korea         | Blood (pseudobacteremia) | 66                       | ICU and general wards                  | 40                    | Commercial 0.5% chlorhexidine (intrinsic contamination). | No                                          | (24)      |
| 2015, Spain               | Blood                    | 91                       | HD center                              | 7                     | Chlorhexidine.                                           | No                                          | (25)      |
| 2016, India               | Blood                    | 90                       | Neonatal unit                          | 12                    | In-use IV fluid bottles, ventilator humidifier           | No                                          | (26)      |
| 2017, India               | Blood                    | 240                      | Pediatric unit                         | 76                    | Amikacin with contaminated rubber stopper.               | No                                          | (27)      |
| 2018, South Korea         | Blood (pseudobacteremia) | 42                       | NICU                                   | 21                    | Commercial 0.5% chlorhexidine (intrinsic contamination)  | No                                          | (28)      |
| 2019, United States       | Blood                    | 150                      | Skilled nursing facilities             | 162                   | IV saline (intrinsic contamination)                      | 5 states, 59 facilities                     | (29)      |

\*An outbreak in Lebanon was excluded because the prolonged outbreak duration was attributed to the political instability at the time of outbreak. Only reports where outbreak duration were described are included). BCC, *Burkholderia cepacia* complex; BMT, bone marrow transplant; HD, hemodialysis; ICU, intensive care unit; IV, intravenous; NICU, neonatal intensive care unit; PICU, pediatric intensive care unit.  
†If exact dates are not specified in the report, the whole month will be counted toward duration of outbreak.

**Appendix Table 4.** Summary of antiseptic- and medication-related *Burkholderia cepacia* complex outbreaks involving  $\geq 50\%$  nonsterile sites\*

| Year of outbreak, country | Site(s) of BCC isolation                                                                                       | Duration of outbreak, d† | Type of patients involved                           | No. affected patients | Implicated source (intrinsic or extrinsic contamination)                  | Multistate or multiple hospital involvement | Reference |
|---------------------------|----------------------------------------------------------------------------------------------------------------|--------------------------|-----------------------------------------------------|-----------------------|---------------------------------------------------------------------------|---------------------------------------------|-----------|
| 1995, United States       | Respiratory tract specimen                                                                                     | 215                      | Medical center                                      | 42                    | Nebulized albuterol (extrinsic contamination)                             | No                                          | (30)      |
| 1996, United States       | Respiratory specimens                                                                                          | 330                      | Several adult ICUs in a hospital                    | 44                    | Albuterol nebulization solution (extrinsically contaminated)              | No                                          | (31)      |
| 2000, United States       | Respiratory specimens                                                                                          | 699                      | Adult ICU, ventilated patients                      | 69                    | Alcohol-free mouthwash (intrinsic contamination)                          | 2 hospitals                                 | (32)      |
| 2005, Saudi Arabia        | Respiratory (31), blood (21), wound (2), CSF (1), eye (1), others (3) (some patients with >1 positive culture) | 336                      | Tertiary care hospital and a 150-bed hospital       | 52                    | Albuterol nebulization solution (intrinsically contaminated)              | 2 hospitals                                 | (33)      |
| 2006, Spain               | Respiratory specimens (35), unspecified (2)                                                                    | 365                      | ICU (35) and non-ICU (2) patients                   | 37                    | Alcohol-free 0.1% hexetidine mouthwash (intrinsically contaminated)       | No                                          | (34)      |
| 2006, United States       | Respiratory tract specimen                                                                                     | 183                      | Adult acute care facility (hospital A)              | 18                    | Contaminated albuterol (extrinsic contamination)                          | No                                          | (35)      |
| 2007, United States       | Respiratory specimens (83), urine (33), blood (20), tissue (3)                                                 | 146                      | Multiple hospitals, especially ventilated patients. | 116                   | Alcohol-free cetylpyridinium chloride mouthwash (intrinsic contamination) | 22 hospitals in 9 states                    | (36)      |

| Year of outbreak, country | Site(s) of BCC isolation                      | Duration of outbreak, d† | Type of patients involved      | No. affected patients | Implicated source (intrinsic or extrinsic contamination)                     | Multistate or multiple hospital involvement | Reference |
|---------------------------|-----------------------------------------------|--------------------------|--------------------------------|-----------------------|------------------------------------------------------------------------------|---------------------------------------------|-----------|
| 2009, Japan               | Vaginal culture                               | 61                       | Obstetrics and gynecology ward | 17                    | 0.025% benzalkonium chloride prepared in hospital pharmacy                   | No                                          | (37)      |
| 2011, United States       | 4 Sinus and 1 tracheal aspirate               | 90                       | Pediatric hospital             | 5                     | 0.05% oxymetazoline hydrochloride nasal spray (intrinsic contamination)      | No                                          | (38)      |
| 2013, South Korea         | Sputum (10), Blood (4), CSF (1), others^ (3). | 92                       | ICU and general wards          | 37                    | Contaminated purified water used for chlorhexidine dilution at hospital site | No                                          | (39)      |
| 2014, Ecuador             | Respiratory specimens                         | 458                      | ICU                            | 13                    | Alcohol-free chlorhexidine 0.12% mouthwash (intrinsic contamination)         | No                                          | (40)      |
| 2018, Australia           | 1 Blood and 6 respiratory specimens           | 61                       | ICU                            | 7                     | Alcohol-free chlorhexidine mouthwash (intrinsic contamination)               | 2 hospitals                                 | (41)      |
| 2018, Germany             | Respiratory specimens                         | 30                       | Postcardiac surgery            | 3                     | Octenidine mouthwash solution (intrinsic contamination)                      | No                                          | (42)      |
| 2019, New Zealand         | Peritoneal dialysis catheter exit sites       | 377                      | Peritoneal dialysis patients   | 9                     | 4% chlorhexidine body wash (extrinsic contamination)                         | No                                          | (43)      |

\*An outbreak in Lebanon was excluded because the prolonged outbreak duration was attributed to the political instability at the time of outbreak. Only reports where outbreak duration were described are included). BCC, *Burkholderia cepacia* complex; CSF, cerebrospinal fluid; ICU, intensive care unit.

†If exact dates are not specified in the report, the whole month will be counted toward duration of outbreak.

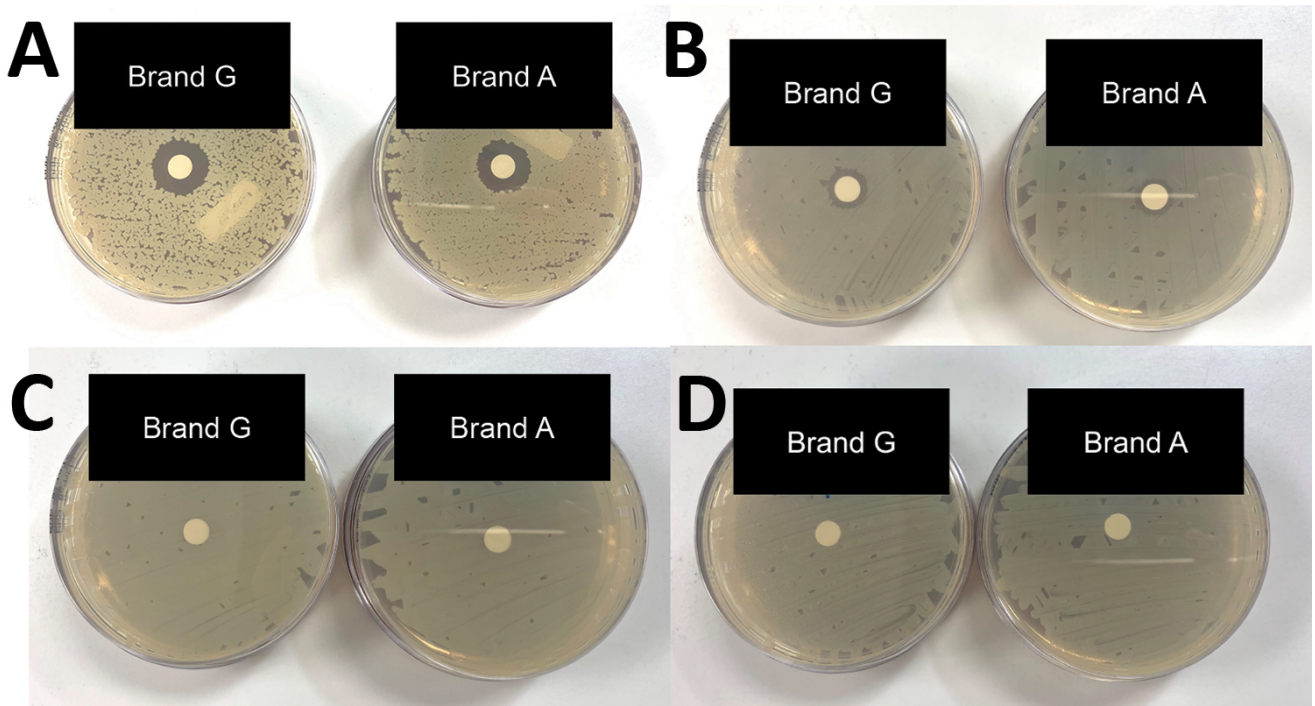

**Appendix Figure.** Activity of 0.05% aqueous chlorhexidine (brands G and A) against *Escherichia coli* ATCC25922, an outbreak-unrelated *Burkholderia cepacia* isolate, and an outbreak-related *B.* isolate. All plates show bacterial lawns with a 0.5 McFarland standard of the test strain against sterile filter paper disk soaked with 40  $\mu$ L of aqueous chlorhexidine and incubated overnight at 37°C. A) *E. coli* ATCC25922 and large zone of inhibition. B) Outbreak-unrelated *B. cepacia* isolate and small zone of inhibition. C) Outbreak-related *B. cepacia* patient isolate, no zone of inhibition. D) Outbreak-related *B. cepacia* isolate from brand A aqueous chlorhexidine, no zone of inhibition.
